# Supplementary material for: Effects of Habitat Fragmentation on the Population Structure and Genetic Diversity of Erythroneurini in the Typical Karst Rocky Ecosystem, Southwest China
Source: MDPI journal article supplement (doi:10.3390/insects13060499), 2022-05-26
Supplement: s1 [file s1]

**Table S1 Overview of sample plots**

| Study areas | Sample plots | Vegetation       | Humidity    |              |
|-------------|--------------|------------------|-------------|--------------|
| Shibing     | SB1          | grass            | 27°9'50" N  | 108°9'14" E  |
|             | SB2          | grass            | 27°9'9" N   | 108°7'20" E  |
|             | SB3          | grass            | 27°12'27" N | 108°2'38" E  |
|             | SB4          | grass            | 27°8'56" N  | 108°1'51" E  |
|             | SB5          | grass            | 27°5'21" N  | 108°4'30" E  |
|             | SB6          | Grass and trees  | 27°8'21" N  | 108°2'18" E  |
|             | SB7          | Grass and shrubs | 27°13'28" N | 108°1'34" E  |
|             | SB8          | grass            | 27°9'32" N  | 108°9'42" E  |
|             | SB9          | Shrubs and trees | 27°9'59" N  | 108°4'19" E  |
| Bijie       | BJ1          | grass            | 27°14'27" N | 105°8'54" E  |
|             | BJ2          | Grass and shrubs | 27°15'1" N  | 105°6'32" E  |
|             | BJ3          | Grass and shrubs | 27°15'33" N | 105°6'49" E  |
|             | BJ4          | grass            | 27°13'37" N | 105°3'23" E  |
|             | BJ5          | grass            | 27°12'25" N | 105°4'51" E  |
|             | BJ6          | grass            | 27°14'2" N  | 105°3'51" E  |
|             | BJ7          | grass            | 27°16'21" N | 105°4'40" E  |
|             | BJ8          | Shrubs and trees | 27°14'7" N  | 105°6'26" E  |
|             | BJ9          | grass            | 27°12'36" N | 105°7'35" E  |
| Huajiang    | HJ1          | grass            | 25°40'38" N | 105°41'5" E  |
|             | HJ2          | grass            | 25°38'27" N | 105°39'18" E |
|             | HJ3          | Shrubs and trees | 25°39'26" N | 105°39'0" E  |
|             | HJ4          | grass            | 25°38'59" N | 105°38'6" E  |
|             | HJ5          | Shrubs and trees | 25°39'11" N | 105°37'46" E |
|             | HJ6          | grass            | 25°38'49" N | 105°38'17" E |
|             | HJ7          | grass            | 25°41'10" N | 105°37'14" E |
|             | HJ8          | Shrubs and trees | 25°39'38" N | 105°38'50" E |
|             | HJ9          | grass            | 25°39'17" N | 105°37'33" E |

**Table S2 Sequencing species information**

| Study area | Sample plots | Habitat fragmentation degree | Species         | Sequencing genes    |
|------------|--------------|------------------------------|-----------------|---------------------|
| Shibing    | SB1          | low                          | <i>E. sipra</i> | <i>Cytb/16S/COI</i> |
|            | SB7          | medium                       | <i>E. sipra</i> | <i>Cytb/16S/COI</i> |
|            | SB4          | high                         | <i>E. sipra</i> | <i>Cytb/16S/COI</i> |
| Bijie      | BJ9          | low                          | <i>E. sipra</i> | <i>Cytb/16S/COI</i> |
|            | BJ5          | medium                       | <i>E. sipra</i> | <i>Cytb/16S/COI</i> |
|            | BJ2          | high                         | <i>E. sipra</i> | <i>Cytb/16S/COI</i> |
| Huajiang   | HJ1          | low                          | <i>E. sipra</i> | <i>Cytb/16S/COI</i> |
|            | HJ8          | medium                       | <i>E. sipra</i> | <i>Cytb/16S/COI</i> |
|            | HJ5          | high                         | <i>E. sipra</i> | <i>Cytb/16S/COI</i> |

Note: The degree of habitat fragmentation is compared to the degree of fragmentation of the sample plots in each study area.

**Table S3 Primer names, sequences used in PCR reactions of genes sequenced**

| Gene        | Primer name | Primer sequence 5'–3'         | Reference                     |
|-------------|-------------|-------------------------------|-------------------------------|
| <i>COI</i>  | LCO1490     | GGTCAACAAATCATAAAGATATTGG     | Simon <i>et al.</i> (1994)    |
|             | HCO2198     | TAAACTTCAGGGTGACCAAAAAATCA    |                               |
| <i>Cytb</i> | CytbF       | GTTCTACCTTGAGGTCAAATATC       | Simon <i>et al.</i> (1994)    |
|             | CytbR       | TTCTACTGGTCGTGCTCCAATTCA      |                               |
| <i>16S</i>  | LR-J-12887  | CCG GTY TGA ACT CAR ATC AWG T | Dietrich <i>et al.</i> (1997) |
|             | LR-N-13398  | CTG TTT AWC AAA AAC ATT TC    |                               |

**Table S4 The reaction system for PCR**

| Reagent                     | Volume |
|-----------------------------|--------|
| CWBIO 2×Es Taq Master Mix   | 12.5   |
| dd H <sub>2</sub> O         | 8.5    |
| DNA template                | 2      |
| Upstream primer (10 ul/L)   | 1      |
| Downstream primer (10 ul/L) | 1      |

**Table S5 The thermal cycling condition for *COI* gene**

| Amplification program    | Time               |
|--------------------------|--------------------|
| 94°C pre-denaturation    | 2.0 min            |
| 94°C denaturation        | 30 s               |
| 51.4°C annealing         | 1.0 min, 35 cycles |
| 72°C extension           | 50 s               |
| 72°C final extension     | 10.0 min           |
| 4°C constant temperature | Forever            |

**Table S6 Habitat fragmentation index of Erythroneurine leafhoppers in three different study areas**

| Study areas | Patchdensity | Landscape             |                       | Separateness         | Fragmentation | Inside habitatarea    |                       |
|-------------|--------------|-----------------------|-----------------------|----------------------|---------------|-----------------------|-----------------------|
|             | index        | fragmentation index   |                       | index                | index         | fragmentation index   |                       |
|             | <i>PD</i>    | <i>FN<sub>1</sub></i> | <i>FN<sub>2</sub></i> | <i>N<sub>i</sub></i> | <i>F</i>      | <i>FI<sub>1</sub></i> | <i>FI<sub>2</sub></i> |
| Shibing     | 0.1223       | 0.0110                | 0.0015                | 0.0004               | 0.0075        | 0.0894                | 0.0975                |
| Bijie       | 0.2304       | 0.0142                | 0.0066                | 0.0012               | 0.3705        | 0.3195                | 0.4261                |
| Huajiang    | 0.3850       | 0.0346                | 0.0187                | 0.0043               | 0.7246        | 0.6447                | 0.8477                |

**Table S7 Habitat fragmentation index of Erythroneurine leafhoppers in the sample plots**

| Study areas | Sample plots | Patch area<br>hm <sup>2</sup> | Patch perimeter<br>km | Separateness index<br>$N_i$ | Inside habitat area fragmentation index<br>$FI_1$ |
|-------------|--------------|-------------------------------|-----------------------|-----------------------------|---------------------------------------------------|
| Shibing     | SB1          | 22910.09                      | 908.42                | 0.0000                      | 0.0089                                            |
|             | SB2          | 22910.09                      | 908.42                | 0.0000                      | 0.0089                                            |
|             | SB3          | 22910.09                      | 908.42                | 0.0000                      | 0.0089                                            |
|             | SB4          | 2.38                          | 0.81                  | 0.3196                      | 0.9999                                            |
|             | SB5          | 22910.09                      | 908.42                | 0.0000                      | 0.0089                                            |
|             | SB6          | 18.67                         | 2.81                  | 0.0407                      | 0.9992                                            |
|             | SB7          | 60.85                         | 7.26                  | 0.0125                      | 0.9974                                            |
|             | SB8          | 5.94                          | 1.36                  | 0.1280                      | 0.9997                                            |
|             | SB9          | 22910.09                      | 908.42                | 0.0000                      | 0.0089                                            |
| Bijie       | BJ1          | 2.26                          | 0.90                  | 0.1888                      | 0.9997                                            |
|             | BJ2          | 95.89                         | 17.27                 | 0.0044                      | 0.9868                                            |
|             | BJ3          | 1.05                          | 0.44                  | 0.4078                      | 0.9999                                            |
|             | BJ4          | 12.02                         | 3.37                  | 0.0355                      | 0.9983                                            |
|             | BJ5          | 21.36                         | 4.82                  | 0.0200                      | 0.9971                                            |
|             | BJ6          | 206.95                        | 29.84                 | 0.0021                      | 0.9715                                            |
|             | BJ7          | 19.59                         | 4.35                  | 0.0218                      | 0.9973                                            |
|             | BJ8          | 106.47                        | 18.65                 | 0.0040                      | 0.9854                                            |
|             | BJ9          | 108.14                        | 21.00                 | 0.0039                      | 0.9851                                            |
| Huajiang    | HJ1          | 24.02                         | 9.30                  | 0.0090                      | 0.9871                                            |
|             | HJ2          | 7.38                          | 2.82                  | 0.0293                      | 0.9960                                            |
|             | HJ3          | 10.43                         | 3.30                  | 0.0207                      | 0.9944                                            |
|             | HJ4          | 23.85                         | 4.10                  | 0.0091                      | 0.9872                                            |
|             | HJ5          | 5.94                          | 2.16                  | 0.0364                      | 0.9968                                            |
|             | HJ6          | 2.07                          | 0.79                  | 0.1045                      | 0.9989                                            |
|             | HJ7          | 108.34                        | 9.08                  | 0.0020                      | 0.9419                                            |
|             | HJ8          | 13.50                         | 2.64                  | 0.0160                      | 0.9928                                            |
|             | HJ9          | 0.86                          | 0.46                  | 0.2500                      | 0.9995                                            |

**Table S8 Species diversity of leafhoppers in different sample plots of Shibing**

| Sample plots | Genus               | Species                         | Number of individuals | Abundance |
|--------------|---------------------|---------------------------------|-----------------------|-----------|
| SB1          | <i>Arboridia</i>    | <i>Arboridia lunula</i>         | 2                     | ++        |
|              |                     | <i>Arboridia</i> sp.fm-2        | 1                     | +         |
|              |                     | <i>Arboridia</i> sp.nov-1       | 6                     | +++       |
|              | <i>Empoascanara</i> | <i>Empoascanara sipra</i>       | 61                    | +++       |
|              | <i>Mitjaevia</i>    | <i>Mitjaevia</i> sp.fm-2        | 2                     | ++        |
|              |                     | <i>Mitjaevia protuberanta</i>   | 12                    | +++       |
|              | <i>Salka</i>        | <i>Salka sawna</i>              | 6                     | +++       |
|              | <i>Seriana</i>      | <i>Seriana bacilla</i>          | 17                    | +++       |
| SB2          | <i>Arboridia</i>    | <i>Arboridia lunula</i>         | 7                     | +++       |
|              | <i>Diomma</i>       | <i>Diomma (Diomma) pincersa</i> | 1                     | ++        |
|              | <i>Empoascanara</i> | <i>Empoascanara sipra</i>       | 14                    | +++       |

|     |                      |                                |     |     |
|-----|----------------------|--------------------------------|-----|-----|
| SB3 | <i>Mitjaevia</i>     | <i>Mitjaevia aurantiaca</i>    | 4   | +++ |
|     |                      | <i>Mitjaevia</i> sp.fm-1       | 1   | ++  |
|     |                      | <i>Mitjaevia protuberanta</i>  | 4   | +++ |
|     | <i>Salka</i>         | <i>Salka sawna</i>             | 1   | ++  |
|     | <i>Seriana</i>       | <i>Seriana bacilla</i>         | 10  | +++ |
|     | Erythroneurini new-1 | Erythroneurini new-1.sp.nov.   | 3   | +++ |
|     | <i>Arboridia</i>     | <i>Arboridia</i> sp.fm-1       | 1   | +   |
|     | <i>Anufrievia</i>    | <i>Anufrievia</i> parisakazu   | 1   | +   |
|     | <i>Empoascanara</i>  | <i>Empoascanara sipra</i>      | 417 | +++ |
|     |                      | <i>Empoascanara</i> sp.fm-2    | 1   | +   |
| SB4 | <i>Salka</i>         | <i>Salka sawna</i>             | 1   | +   |
|     | <i>Seriana</i>       | <i>Seriana bacilla</i>         | 1   | +   |
|     | Erythroneurini new-1 | Erythroneurini new-1.sp.nov.   | 3   | +   |
|     | <i>Ziczacella</i>    | <i>Ziczacella steggerdai</i>   | 6   | ++  |
|     | <i>Empoascanara</i>  | <i>Empoascanara sipra</i>      | 100 | +++ |
| SB5 | <i>Seriana</i>       | <i>Seriana bacilla</i>         | 5   | ++  |
|     | <i>Arboridia</i>     | <i>Arboridia lunula</i>        | 6   | +++ |
|     | <i>Empoascanara</i>  | <i>Empoascanara dwalata</i>    | 4   | ++  |
|     |                      | <i>Empoascanara sipra</i>      | 29  | +++ |
|     |                      | <i>Empoascanara gracilis</i>   | 9   | +++ |
| SB6 | <i>Kapsa</i>         | <i>Kapsa</i> sp.fm-1           | 1   | ++  |
|     | <i>Salka</i>         | <i>Salka sawna</i>             | 5   | +++ |
|     | <i>Seriana</i>       | <i>Seriana bacilla</i>         | 25  | +++ |
|     | Erythroneurini new-1 | Erythroneurini new-1.sp.nov.   | 2   | ++  |
|     | <i>Arboridia</i>     | <i>Arboridia lunula</i>        | 1   | +   |
|     | <i>Empoascanara</i>  | <i>Empoascanara sipra</i>      | 203 | +++ |
|     | <i>Mitjaevia</i>     | <i>Mitjaevia aurantiaca</i>    | 1   | +   |
|     | <i>Salka</i>         | <i>Salka sawna</i>             | 3   | ++  |
|     | <i>Seriana</i>       | <i>Seriana bacilla</i>         | 17  | +++ |
|     | <i>Empoascanara</i>  | <i>Empoascanara sipra</i>      | 433 | +++ |
| SB7 | <i>Mitjaevia</i>     | <i>Mitjaevia protuberanta</i>  | 1   | +   |
|     | <i>Salka</i>         | <i>Salka sawna</i>             | 1   | +   |
|     | <i>Seriana</i>       | <i>Seriana bacilla</i>         | 7   | ++  |
|     | <i>Ziczacella</i>    | <i>Ziczacella steggerdai</i>   | 1   | +   |
|     | <i>Empoascanara</i>  | <i>Empoascanara sipra</i>      | 6   | +++ |
| SB8 | <i>Mitjaevia</i>     | <i>Mitjaevia aurantiaca</i>    | 1   | +++ |
|     | Erythroneurini new-1 | Erythroneurini new-1.sp.nov.   | 1   | +++ |
|     | <i>Arboridia</i>     | <i>Arboridia</i> sp.nov-1      | 3   | ++  |
|     | <i>Anufrievia</i>    | <i>Anufrievia</i> sp.nov-1     | 1   | +   |
|     | <i>Empoascanara</i>  | <i>Empoascanara sipra</i>      | 4   | ++  |
| SB9 |                      | <i>Empoascanara</i> sp.fm-1    | 1   | +   |
|     |                      | <i>Empoascanara</i> sp.fm-3    | 1   | +   |
|     |                      | <i>Empoascanara</i> sp.fm-4    | 1   | +   |
|     | <i>Mitjaevia</i>     | <i>Mitjaevia dworakowskiae</i> | 33  | +++ |
|     |                      |                                |     |     |

|  |                |                               |    |     |
|--|----------------|-------------------------------|----|-----|
|  |                | <i>Mitjaevia shibingensis</i> | 69 | +++ |
|  |                | <i>Mitjaevia protuberanta</i> | 2  | ++  |
|  | <i>Salka</i>   | <i>Salka sawna</i>            | 3  | ++  |
|  | <i>Seriana</i> | <i>Seriana bacilla</i>        | 17 | +++ |

**Table S9 Species diversity of leafhoppers in different sample plots of Bijie**

| Sample plots | Genus               | Species                     | Number of individuals | Abundance |
|--------------|---------------------|-----------------------------|-----------------------|-----------|
| BJ1          | <i>Empoascanara</i> | <i>Empoascanara sipra</i>   | 107                   | +++       |
| BJ2          | <i>Empoascanara</i> | <i>Empoascanara sipra</i>   | 1727                  | +++       |
|              |                     | <i>Empoascanara</i> sp.fm-5 | 2                     | +         |
|              | <i>Kapsa</i>        | <i>Kapsa dolka</i>          | 1                     | +         |
|              |                     | <i>Kapsa alba</i>           | 1                     | +         |
|              | <i>Mitjaevia</i>    | <i>Mitjaevia diana</i>      | 1                     | +         |
|              | <i>Salka</i>        | <i>Salka sawna</i>          | 2                     | +         |
| BJ3          | <i>Empoascanara</i> | <i>Empoascanara sipra</i>   | 459                   | +++       |
| BJ4          | <i>Empoascanara</i> | <i>Empoascanara sipra</i>   | 795                   | +++       |
|              | <i>Mitjaevia</i>    | <i>Mitjaevia</i> sp.fm-3    | 1                     | +         |
| BJ5          | <i>Empoascanara</i> | <i>Empoascanara sipra</i>   | 473                   | +++       |
|              | <i>Mitjaevia</i>    | <i>Mitjaevia</i> sp.nov-1   | 1                     | +         |
|              |                     | <i>Mitjaevia diana</i>      | 3                     | +         |
| BJ6          | <i>Empoascanara</i> | <i>Empoascanara sipra</i>   | 448                   | +++       |
|              | <i>Kapsa</i>        | <i>Kapsa dolka</i>          | 3                     | +         |
|              | <i>Mitjaevia</i>    | <i>Mitjaevia</i> sp.nov-1   | 11                    | ++        |
|              |                     | <i>Mitjaevia</i> sp.nov-2   | 1                     | +         |
|              |                     | <i>Mitjaevia</i> sp.nov-3   | 1                     | +         |
|              |                     | <i>Mitjaevia</i> sp.fm-3    | 2                     | +         |
|              |                     | <i>Mitjaevia diana</i>      | 1                     | +         |
|              | <i>Salka</i>        | <i>Salka sawna</i>          | 1                     | +         |
|              | <i>Thaia</i>        | <i>Thaia</i> sp.fm-1        | 1                     | +         |
| BJ7          | <i>Empoascanara</i> | <i>Empoascanara sipra</i>   | 288                   | +++       |
|              | <i>Kapsa</i>        | <i>Kapsa dolka</i>          | 1                     | +         |
|              | <i>Mitjaevia</i>    | <i>Mitjaevia</i> sp.nov-1   | 1                     | +         |
| BJ8          | <i>Arboridia</i>    | <i>Arboridia echinata</i>   | 1                     | ++        |
|              | <i>Empoascanara</i> | <i>Empoascanara sipra</i>   | 31                    | +++       |
|              | <i>Kapsa</i>        | <i>Kapsa arca</i>           | 1                     | ++        |
|              | <i>Mitjaevia</i>    | <i>Mitjaevia</i> sp.nov-1   | 2                     | +++       |
|              |                     | <i>Mitjaevia diana</i>      | 2                     | +++       |
|              | <i>Salka</i>        | <i>Salka sawna</i>          | 1                     | ++        |
| BJ9          | <i>Arboridia</i>    | <i>Arboridia</i> sp.fm-3    | 1                     | +         |
|              | <i>Anufrievia</i>   | <i>Anufrievia</i> sp.nov-2  | 2                     | +         |
|              | <i>Empoascanara</i> | <i>Empoascanara sipra</i>   | 857                   | +++       |
|              | <i>Kapsa</i>        | <i>Kapsa dolka</i>          | 7                     | +         |
|              |                     | <i>Kapsa alba</i>           | 2                     | +         |
|              | <i>Mitjaevia</i>    | <i>Mitjaevia diana</i>      | 5                     | +         |

|                   |                          |   |   |
|-------------------|--------------------------|---|---|
| <i>Tautoneura</i> | <i>Tautoneura albida</i> | 1 | + |
|-------------------|--------------------------|---|---|

**Table S10 Species diversity of leafhoppers in different sample plots of Huajiang**

| Sample plots | Genus                | Species                      | Number of individuals | Abundance |
|--------------|----------------------|------------------------------|-----------------------|-----------|
| HJ1          | <i>Arboridia</i>     | <i>Arboridia</i> sp.fm-4     | 1                     | +++       |
|              | <i>Empoascanara</i>  | <i>Empoascanara sipra</i>    | 2                     | +++       |
|              | <i>Kapsa</i>         | <i>Kapsa dolka</i>           | 1                     | +++       |
|              | <i>Seriana</i>       | <i>Seriana bacilla</i>       | 9                     | +++       |
|              | <i>Thaia</i>         | <i>Thaia</i> sp.fm-2         | 3                     | +++       |
| HJ2          | <i>Empoascanara</i>  | <i>Empoascanara</i> sp.fm-6  | 2                     | ++        |
|              |                      | <i>Empoascanara sipra</i>    | 2                     | ++        |
|              | <i>Seriana</i>       | <i>Seriana bacilla</i>       | 45                    | +++       |
| HJ3          | <i>Elbelus</i>       | <i>Elbelus tripunctatus</i>  | 21                    | +++       |
|              | <i>Empoascanara</i>  | <i>Empoascanara</i> sp.fm-6  | 1                     | ++        |
|              |                      | <i>Empoascanara sipra</i>    | 3                     | +++       |
| HJ4          | <i>Arboridia</i>     | <i>Arboridia</i> sp.fm-4     | 1                     | ++        |
|              | <i>Empoascanara</i>  | <i>Empoascanara mai</i>      | 1                     | ++        |
|              | <i>Seriana</i>       | <i>Seriana ochrata</i>       | 8                     | +++       |
|              |                      | <i>Seriana bacilla</i>       | 47                    | +++       |
|              | <i>Thaia</i>         | <i>Thaia</i> sp.fm-3         | 1                     | ++        |
| HJ5          | <i>Empoascanara</i>  | <i>Empoascanara sipra</i>    | 1                     | +++       |
|              | <i>Seriana</i>       | <i>Seriana bacilla</i>       | 8                     | +++       |
| HJ6          | <i>Seriana</i>       | <i>Seriana bacilla</i>       | 3                     | +++       |
| HJ7          | Erythroneurini new-2 | Erythroneurini               | 8                     | +++       |
|              |                      | new-2.sp.nov.                |                       |           |
|              | <i>Empoascanara</i>  | <i>Empoascanara</i> sp.fm-6  | 1                     | ++        |
|              |                      | <i>Empoascanara sipra</i>    | 3                     | +++       |
|              | <i>Kapsa</i>         | <i>Kapsa</i> sp.nov-1        | 5                     | +++       |
|              |                      | <i>Kapsa dolka</i>           | 1                     | ++        |
|              | <i>Seriana</i>       | <i>Seriana bacilla</i>       | 7                     | +++       |
| HJ8          | <i>Elbelus</i>       | <i>Elbelus tripunctatus</i>  | 23                    | +++       |
|              | <i>Empoascanara</i>  | <i>Empoascanara sipra</i>    | 2                     | ++        |
|              | <i>Seriana</i>       | <i>Seriana ochrata</i>       | 4                     | +++       |
|              |                      | <i>Seriana bacilla</i>       | 23                    | +++       |
| HJ9          | <i>Empoascanara</i>  | <i>Empoascanara</i> sp.nov-1 | 1                     | +++       |
|              | <i>Mitjaevia</i>     | <i>Mitjaevia</i> sp.fm-4     | 1                     | +++       |

**Table S11 Community diversity of Erythroneurine leafhoppers in different study areas**

| Study areas | Number of genus | Number of species | Number of individuals | Mrrgalef Species richness index | Shannon-Wiene r Diversity index | BSimpson Dominance index | Pieluo Uniformity index |
|-------------|-----------------|-------------------|-----------------------|---------------------------------|---------------------------------|--------------------------|-------------------------|
|             | <i>GN</i>       | <i>SN</i>         | <i>IN</i>             | <i>R</i>                        | <i>H'</i>                       | <i>C</i>                 | <i>J'</i>               |
| Shibing     | 10              | 25                | 1580                  | 3.2719                          | 0.5594                          | 0.0318                   | 0.1645                  |
| Bijie       | 8               | 16                | 5245                  | 1.6924                          | 0.2862                          | 0.5382                   | 0.1032                  |

Huajiang      8                      14                      239                      1.4667                      0.1625                      0.0005                      0.0616

**Table S12 Community diversity of Erythroneurine leafhoppers in each sample plot**

| Study areas | Sample plots | Number of genus | Number of species | Number of individuals | Mrrgalef Species richness index | Shannon-Wiener Diversity index | BSimpson Dominance index | Pieluo Uniformity index |
|-------------|--------------|-----------------|-------------------|-----------------------|---------------------------------|--------------------------------|--------------------------|-------------------------|
|             |              | <i>GN</i>       | <i>SN</i>         | <i>IN</i>             | <i>R</i>                        | <i>H'</i>                      | <i>C</i>                 | <i>J'</i>               |
| Shibing     | SB1          | 5               | 8                 | 107                   | 1.4980                          | 1.3736                         | 0.3699                   | 0.6606                  |
|             | SB2          | 7               | 9                 | 45                    | 2.1016                          | 1.9831                         | 0.1687                   | 0.9025                  |
|             | SB3          | 7               | 9                 | 431                   | 1.3188                          | 0.3307                         | 0.8798                   | 0.1505                  |
|             | SB4          | 2               | 2                 | 105                   | 0.2149                          | 0.1914                         | 0.9093                   | 0.2761                  |
|             | SB5          | 6               | 8                 | 81                    | 1.5929                          | 1.6336                         | 0.2483                   | 0.7856                  |
|             | SB6          | 5               | 5                 | 225                   | 0.7385                          | 0.3937                         | 0.8199                   | 0.2446                  |
|             | SB7          | 5               | 5                 | 443                   | 0.6564                          | 0.1291                         | 0.9556                   | 0.0802                  |
|             | SB8          | 3               | 3                 | 8                     | 0.9618                          | 0.7356                         | 0.5938                   | 0.6696                  |
|             | SB9          | 6               | 11                | 135                   | 2.0386                          | 1.4295                         | 0.3391                   | 0.5961                  |
| Bijie       | BJ1          | 1               | 1                 | 107                   | 0.0000                          | 0.0000                         | 1.0000                   | 0.0000                  |
|             | BJ2          | 4               | 6                 | 1734                  | 0.6704                          | 0.0325                         | 0.9919                   | 0.0182                  |
|             | BJ3          | 1               | 1                 | 459                   | 0.0000                          | 0.0000                         | 1.0000                   | 0.0000                  |
|             | BJ4          | 2               | 2                 | 796                   | 0.1497                          | 0.0096                         | 0.9975                   | 0.0139                  |
|             | BJ5          | 2               | 3                 | 477                   | 0.3243                          | 0.0532                         | 0.9833                   | 0.0484                  |
|             | BJ6          | 5               | 9                 | 469                   | 1.3007                          | 0.2529                         | 0.9131                   | 0.1151                  |
|             | BJ7          | 3               | 3                 | 290                   | 0.3527                          | 0.0460                         | 0.9863                   | 0.0418                  |
|             | BJ8          | 5               | 6                 | 38                    | 1.3745                          | 0.7632                         | 0.6731                   | 0.4260                  |
|             | BJ9          | 6               | 7                 | 875                   | 0.8857                          | 0.1318                         | 0.9594                   | 0.0677                  |
| Huajiang    | HJ1          | 5               | 5                 | 16                    | 1.4427                          | 1.2440                         | 0.3750                   | 0.7730                  |
|             | HJ2          | 2               | 3                 | 49                    | 0.5139                          | 0.3393                         | 0.8467                   | 0.3089                  |
|             | HJ3          | 2               | 3                 | 25                    | 0.6213                          | 0.5296                         | 0.7216                   | 0.4821                  |
|             | HJ4          | 4               | 5                 | 58                    | 0.9851                          | 0.6537                         | 0.6766                   | 0.4062                  |
|             | HJ5          | 2               | 2                 | 9                     | 0.4551                          | 0.3488                         | 0.8025                   | 0.5033                  |
|             | HJ6          | 1               | 1                 | 3                     | 0.0000                          | 0.0000                         | 1.0000                   | 0.0000                  |
|             | HJ7          | 4               | 6                 | 25                    | 1.5533                          | 1.5549                         | 0.2384                   | 0.8678                  |
|             | HJ8          | 3               | 4                 | 52                    | 0.7593                          | 1.0442                         | 0.3987                   | 0.7533                  |
|             | HJ9          | 2               | 2                 | 2                     | 1.4427                          | 0.6931                         | 0.5000                   | 1.0000                  |

**Table S13  $\Gamma_{st}$  and  $F_{st}$  values of fragmented populations of Erythroneurine leafhoppers in the study area**

| Gene        | Study area | Population | 1      | 2       | 3       |
|-------------|------------|------------|--------|---------|---------|
| <i>Cytb</i> | Shibing    | 1          | —      | -0.9091 | -0.0667 |
|             |            | 2          | 0.0233 | —       | -0.6250 |
|             |            | 3          | 0.0278 | 0.0365  | —       |
|             | Bijie      | 1          | —      | -0.4000 | -0.6000 |
|             |            | 2          | 0.1765 | —       | 0.0000  |
|             |            | 3          | 0.1111 | 0.3333  | —       |
|             | Huajiang   | 1          | —      | -0.2500 | 0.0000  |

| Gene     | Study area | Population | 1      | 2       | 3       |
|----------|------------|------------|--------|---------|---------|
| 16S rRNA | Shibing    | 2          | 0.2308 | —       | -0.7500 |
|          |            | 3          | 0.3333 | 0.1067  | —       |
|          |            | 1          | —      | -0.5714 | -0.4286 |
|          | Bijie      | 2          | 0.1200 | —       | 0.0000  |
|          |            | 3          | 0.1667 | 0.3333  | —       |
|          |            | 1          | —      | -1.0000 | 0.0000  |
|          | Huajiang   | 2          | 0.0000 | —       | 0.0000  |
|          |            | 3          | 0.3333 | 0.3333  | —       |
|          |            | 1          | —      | 0.0000  | 0.0000  |
| COI      | Shibing    | 2          | 0.3333 | —       | -1.0000 |
|          |            | 3          | 0.3333 | 0.0000  | —       |
|          |            | 1          | —      | -0.1667 | -0.5000 |
|          | Bijie      | 2          | 0.2632 | —       | -0.3333 |
|          |            | 3          | 0.1429 | 0.2000  | —       |
|          |            | 1          | —      | -0.2000 | -0.6000 |
|          | Huajiang   | 2          | 0.2500 | —       | -0.2000 |
|          |            | 3          | 0.1111 | 0.2500  | —       |
|          |            | 1          | —      | -1.0000 | 0.0000  |
| Combine  | Shibing    | 2          | 0.0000 | —       | 0.0000  |
|          |            | 3          | 0.3333 | 0.3333  | —       |
|          |            | 1          | —      | -0.6250 | -0.2917 |
|          | Bijie      | 2          | 0.1035 | —       | -0.0833 |
|          |            | 3          | 0.2152 | 0.2973  | —       |
|          |            | 1          | —      | -0.5625 | -0.3750 |
|          | Huajiang   | 2          | 0.1228 | —       | -0.0625 |
|          |            | 3          | 0.1852 | 0.3061  | —       |
|          |            | 1          | —      | -0.3333 | 0.0000  |

Note: Below the diagonal:  $\Gamma_{st}$  values, above the diagonal:  $F_{st}$  values.

**Table S14 Measured values of environmental factors in different study areas and plots**

| Study areas | Sample plots | Humidity(%) | Temperature(°C) | Altitude(m) |
|-------------|--------------|-------------|-----------------|-------------|
| Shibing     | —            | 64          | 27              | 927         |
| Bijie       | —            | 57          | 24              | 1731        |
| Huajiang    | —            | 74          | 25              | 941         |
| Shibing     | SB1          | 64          | 29              | 1034        |
|             | SB2          | 57          | 27.5            | 969         |
|             | SB3          | 71          | 24.5            | 1187        |
|             | SB4          | 60          | 30.5            | 575         |
|             | SB5          | 72.5        | 28              | 702         |
|             | SB6          | 68          | 28.5            | 896.5       |
|             | SB7          | 63          | 25.5            | 1059        |
|             | SB8          | 56.5        | 26.5            | 996         |
|             | SB9          | 54.5        | 28.5            | 855         |
| Bijie       | BJ1          | 59.5        | 28              | 1279.5      |



|          |     |      |      |        |
|----------|-----|------|------|--------|
| Huajiang | BJ2 | 63   | 24   | 1879   |
|          | BJ3 | 67.5 | 23.5 | 1825   |
|          | BJ4 | 60.5 | 24.8 | 1862.5 |
|          | BJ5 | 49.5 | 22.5 | 1537   |
|          | BJ6 | 54.5 | 25.5 | 1785.5 |
|          | BJ7 | 67   | 24   | 1942   |
|          | BJ8 | 53.5 | 26.5 | 1677   |
|          | BJ9 | 49.5 | 24.5 | 1643   |
|          | HJ1 | 75   | 26   | 999.5  |
|          | HJ2 | 77   | 25   | 1084   |
|          | HJ3 | 79   | 20.5 | 762    |
|          | HJ4 | 71   | 28   | 935    |
|          | HJ5 | 71   | 28   | 935    |
|          | HJ6 | 75   | 27   | 890    |
|          | HJ7 | 68.2 | 29.8 | 1078   |
|          | HJ8 | 81   | 22   | 864    |
|          | HJ9 | 60   | 22   | 882    |
| <hr/>    |     |      |      |        |
